# Supplementary material
Source: MDPI journal article supplement (https://www.mdpi.com/2071-1050/15/10/7924)
Supplement: s1 [file s1]

Archive with 4 entries (4 files):
- S1 Raw Data pXRF and ICP-MS Comparison.xlsx
- S2 Raw Data Moisture Content Analysis.xlsx
- S3 Raw Data Carbon and Nitrogen Content.xlsx
- Sustainability Supplementary Materials.pdf
