# Supplementary material
Source: MDPI journal article supplement (https://www.mdpi.com/2071-1050/15/10/7924)
Supplement: s1 [file s1 › S1 Raw Data pXRF and ICP-MS Comparison.xlsx]

## Sheet: Pb Raw Data
Sample ID	In-Situ pXRF (ppm)						Pellet pXRF (ppm)		AD/ICP-MS (ppm)
	Scan 1 of 3	Error (1σ)	Scan 2 of 3	Error (1σ)	Scan 3 of 3	Error (1σ)	Scan 1 of 1	Error (1σ)
1-07-15	485	6	372	5	341	5	424	5	510
1-07-30	621	6	604	7	548	7	588	6	600
1-10-15	81	3	39	2	47	2	84	3	73
1-10-30	40	2	31	2	37	2	45	2	31
1-18-15	177	3	211	3	196	3	205	4	230
1-18-30	234	4	235	4	224	4	248	4	240
1-20-15	181	3	172	3	165	3	179	3	160
1-20-30	163	3	183	4	161	3	176	3	160
1-30-15	24	2	22	2	26	2	27	2	16
1-30-30	20	2	23	2	20	2	19	2	11
1-34-15	125	3	162	3	137	3	134	3	120
1-34-30	97	3	146	3	164	4	141	3	99
1-37-15	1146	12	1272	10	756	7	1019	8	889
1-37-30	771	8	272	4	781	12	882	8	960
1-38-15	739	7	1083	8	938	9	854	7	620
1-38-30	602	7	205	4	631	7	515	6	550
1-39-15	397	5	355	5	419	5	718	7	450
1-39-30	569	5	198	4	488	5	535	6	290
1-40-15	112	3	156	3	129	3	100	3	90
1-40-30	198	4	143	3	131	4	187	4	160
1-46-15	192	3	202	3	151	3	188	4	160
1-46-30	80	2	80	2	113	3	96	3	59
1-49-15	678	7	664	7	810	9	792	7	589
1-49-30	231	4	432	6	312	6	395	5	370
1-50-15	313	6	377	7	422	7	389	5	290
1-50-30	36	2	47	2	52	2	52	2	41
1-51-15	416	6	330	6	413	5	375	5	360
1-51-30	57	2	85	3	85	3	145	3	73
1-52-15	354	6	264	5	337	5	260	4	210
1-52-30	99	3	302	6	141	4	286	4	200

## Sheet: Cr Raw Data
Sample ID	In-Situ pXRF (ppm)						Pellet pXRF (ppm)		AD/ICP-MS (ppm)
	Scan 1 of 3	Error (1σ)	Scan 2 of 3	Error (1σ)	Scan 3 of 3	Error (1σ)	Scan 1 of 1	Error (1σ)
1-07-15	70	15	80	15	52	15	50	15	32
1-07-30	104	15	85	15	103	16	107	16	26
1-10-15	0	69	78	17	88	15	72	16	36
1-10-30	71	15	70	15	94	15	63	15	32
1-18-15	71	14	81	13	75	14	0	49	27
1-18-30	82	15	86	14	62	15	57	15	23
1-20-15	62	14	64	13	53	13	89	15	23
1-20-30	49	13	75	14	79	16	54	15	25
1-30-15	90	16	61	13	91	16	93	15	22
1-30-30	78	15	0	56	102	15	76	15	21
1-34-15	46	13	93	14	73	13	81	15	21
1-34-30	77	17	82	14	79	17	59	16	21
1-37-15	74	20	91	15	70	14	97	15	20
1-37-30	67	16	52	13	0	93	76	15	24
1-38-15	65	13	62	14	0	48	49	15	14
1-38-30	147	17	101	17	57	16	0	49	16
1-39-15	52	13	77	14	53	14	92	15	14
1-39-30	39	11	83	16	67	12	78	15	13
1-40-15	55	13	63	13	76	14	52	15	16
1-40-30	83	15	101	16	73	18	55	15	23
1-46-15	59	13	54	14	104	14	78	15	24
1-46-30	78	14	72	15	88	14	83	15	19
1-49-15	78	16	82	16	77	17	0	51	26
1-49-30	97	16	73	17	0	68	74	16	28
1-50-15	65	18	0	72	100	19	50	15	14
1-50-30	120	15	62	17	89	15	87	16	22
1-51-15	72	15	81	18	71	15	54	15	15
1-51-30	80	15	119	17	89	17	84	15	23
1-52-15	69	17	85	18	67	14	60	15	16
1-52-30	114	17	0	65	81	18	94	16	13

## Sheet: Se Raw Data
Sample ID	In-Situ pXRF (ppm)						Pellet pXRF (ppm)		AD/ICP-MS (ppm)
	Scan 1 of 3	Error (1σ)	Scan 2 of 3	Error (1σ)	Scan 3 of 3	Error (1σ)	Scan 1 of 1	Error (1σ)
1-07-15	0	7	0	7	0	7	0	7	13
1-07-30	0	7	2	1	0	7	0	7	10
1-10-15	0	7	0	7	0	6	0	6	15
1-10-30	0	6	0	6	0	6	0	6	14
1-18-15	0	6	0	6	0	6	0	6	4.4
1-18-30	0	6	0	6	0	7	0	7	4.2
1-20-15	0	6	0	6	0	6	0	6	3.6
1-20-30	0	6	0	6	0	7	0	6	3.4
1-30-15	0	6	0	5	0	6	0	6	3
1-30-30	0	6	0	6	0	6	0	6	3.5
1-34-15	0	5	0	6	0	5	0	6	3.2
1-34-30	0	7	0	6	0	7	0	6	3.1
1-37-15	0	11	0	8	0	7	0	8	2.7
1-37-30	0	8	0	6	0	13	0	8	3
1-38-15	0	7	0	8	0	7	0	8	2.9
1-38-30	0	8	0	7	0	8	0	7	3
1-39-15	0	6	0	7	0	7	0	8	0
1-39-30	0	6	0	7	0	6	0	7	2.7
1-40-15	0	5	0	6	0	6	0	6	3
1-40-30	0	6	2	1	0	7	0	6	3.4
1-46-15	0	6	0	6	0	6	0	6	3.7
1-46-30	0	6	0	6	0	6	0	6	3.8
1-49-15	0	8	0	8	0	9	0	8	4
1-49-30	0	7	0	8	0	8	0	7	4.5
1-50-15	0	8	0	9	0	9	0	7	2.9
1-50-30	0	6	0	7	0	6	0	6	5.1
1-51-15	0	7	0	8	0	7	0	7	3.8
1-51-30	0	6	0	6	0	7	0	6	5
1-52-15	0	8	0	7	0	6	0	6	3.5
1-52-30	0	7	0	7	0	6	0	6	3.5

## Sheet: As Raw Data
Sample ID	In-Situ pXRF (ppm)						Pellet pXRF (ppm)		AD/ICP-MS (ppm)
	Scan 1 of 3	Error (1σ)	Scan 2 of 3	Error (1σ)	Scan 3 of 3	Error (1σ)	Scan 1 of 1	Error (1σ)
1-07-15	0	43	0	40	0	39	0	40	7.7
1-07-30	0	46	0	46	20	5	0	45	7.2
1-10-15	8	2	0	17	8	2	8	2	7.2
1-10-30	8	2	8	2	0	15	8	2	6
1-18-15	0	26	10	3	0	27	0	29	6.9
1-18-30	18	3	11	3	0	31	0	31	5.2
1-20-15	10	3	11	2	0	25	0	27	4.2
1-20-30	9	2	0	28	0	27	10	3	5.2
1-30-15	6	1	7	1	6	1	6	1	3.1
1-30-30	7	1	6	1	8	1	8	1	3.1
1-34-15	0	21	13	3	7	2	0	24	4.7
1-34-30	9	2	0	25	0	29	0	25	4
1-37-15	34	8	0	64	23	5	0	60	4.3
1-37-30	31	6	28	3	46	9	0	57	5
1-38-15	15	5	55	6	43	6	0	55	3.2
1-38-30	39	5	34	3	27	5	0	44	4
1-39-15	0	37	16	4	16	4	0	52	3.4
1-39-30	61	4	21	3	14	4	0	45	3.2
1-40-15	6	2	9	2	0	22	0	21	3.3
1-40-30	13	3	0	26	18	3	0	28	5
1-46-15	0	26	0	27	8	2	0	28	5.1
1-46-30	0	18	9	2	7	2	0	21	8.7
1-49-15	0	53	0	53	0	59	0	53	5.8
1-49-30	0	32	21	5	0	42	0	39	4.8
1-50-15	19	4	39	5	21	5	0	39	3.9
1-50-30	9	2	6	2	7	2	6	2	3.2
1-51-15	44	4	24	4	18	4	0	37	4.9
1-51-30	8	2	8	2	14	2	0	25	5
1-52-15	28	4	0	36	12	4	0	32	4.1
1-52-30	14	2	45	4	19	3	0	33	3.7

## Sheet: Ni Raw Data
Sample ID	In-Situ pXRF (ppm)						Pellet pXRF (ppm)
	Scan 1 of 3	Error (1σ)	Scan 2 of 3	Error (1σ)	Scan 3 of 3	Error (1σ)	Scan 1 of 1	Error (1σ)
1-07-15	25	3	23	3	23	3	25	3
1-07-30	32	3	29	3	39	4	32	3
1-10-15	30	4	38	4	31	3	28	3
1-10-30	29	3	32	3	35	3	20	3
1-18-15	37	3	24	3	22	3	17	3
1-18-30	22	3	23	3	26	3	21	3
1-20-15	21	3	25	3	20	3	12	3
1-20-30	24	3	22	3	26	3	17	3
1-30-15	29	3	20	3	22	3	14	3
1-30-30	25	3	28	3	25	3	18	3
1-34-15	14	3	38	3	24	3	17	3
1-34-30	28	4	31	3	31	4	21	3
1-37-15	42	5	34	3	13	3	29	3
1-37-30	33	3	10	2	30	6	15	3
1-38-15	27	3	26	3	39	3	22	3
1-38-30	26	4	40	4	31	4	25	3
1-39-15	24	3	21	3	26	3	17	3
1-39-30	20	2	19	3	21	2	19	3
1-40-15	28	3	28	3	26	3	20	3
1-40-30	33	3	31	4	35	4	29	3
1-46-15	25	3	24	3	31	3	23	3
1-46-30	31	3	29	3	33	3	22	3
1-49-15	33	4	28	4	28	4	19	3
1-49-30	32	4	38	4	33	4	22	3
1-50-15	37	4	32	4	27	4	23	3
1-50-30	323	3	30	4	33	3	19	3
1-51-15	26	3	27	4	24	3	28	3
1-51-30	26	3	26	3	24	3	14	3
1-52-15	28	4	31	4	22	3	21	3
1-52-30	35	3	36	4	35	4	25	3

## Sheet: Cu Raw Data
Sample ID	In-Situ pXRF (ppm)						Pellet pXRF (ppm)
	Scan 1 of 3	Error (1σ)	Scan 2 of 3	Error (1σ)	Scan 3 of 3	Error (1σ)	Scan 1 of 1	Error (1σ)
1-07-15	37	3	39	3	35	3	48	3
1-07-30	55	4	71	4	84	4	55	4
1-10-15	46	4	41	4	39	3	38	3
1-10-30	40	4	37	3	33	3	44	3
1-18-15	41	3	45	3	42	3	33	3
1-18-30	48	4	44	3	42	3	38	3
1-20-15	36	3	34	3	36	3	32	3
1-20-30	42	3	40	3	50	4	65	4
1-30-15	42	3	31	3	45	4	44	3
1-30-30	44	3	49	4	39	3	41	3
1-34-15	31	3	35	3	38	3	36	3
1-34-30	35	4	36	3	38	4	40	3
1-37-15	63	5	61	4	42	3	46	3
1-37-30	61	4	38	3	60	6	52	3
1-38-15	78	4	132	4	103	4	316	7
1-38-30	79	4	67	4	78	4	58	4
1-39-15	48	3	56	3	42	3	41	3
1-39-30	66	3	41	3	47	3	44	3
1-40-15	40	3	44	3	43	3	44	3
1-40-30	59	4	45	4	49	4	50	4
1-46-15	42	3	48	3	40	3	45	3
1-46-30	37	3	45	3	39	3	36	3
1-49-15	48	4	42	4	53	3	43	3
1-49-30	38	4	41	4	49	4	29	3
1-50-15	47	4	53	5	47	4	44	3
1-50-30	29	3	26	4	36	3	30	3
1-51-15	84	4	61	5	68	4	55	4
1-51-30	39	3	30	3	37	4	26	3
1-52-15	71	4	68	5	61	4	53	4
1-52-30	37	3	220	7	53	5	74	4

## Sheet: Zn Raw Data
Sample ID	In-Situ pXRF (ppm)						Pellet pXRF (ppm)
	Scan 1 of 3	Error (1σ)	Scan 2 of 3	Error (1σ)	Scan 3 of 3	Error (1σ)	Scan 1 of 1	Error (1σ)
1-07-15	397	6	368	6	322	6	375	6
1-07-30	494	7	492	7	432	7	403	6
1-10-15	147	5	124	4	150	4	152	4
1-10-30	108	4	104	4	115	4	112	3
1-18-15	288	5	309	5	248	5	292	5
1-18-30	283	5	270	5	252	5	265	5
1-20-15	211	4	206	4	196	4	194	4
1-20-30	240	5	217	5	206	5	193	4
1-30-15	81	3	62	2	67	3	74	3
1-30-30	71	3	75	3	73	3	69	3
1-34-15	146	3	209	4	172	4	157	4
1-34-30	128	4	176	4	198	5	183	4
1-37-15	667	10	536	7	463	6	463	6
1-37-30	539	8	188	4	498	12	465	7
1-38-15	445	6	624	7	454	6	489	7
1-38-30	416	7	281	6	369	6	270	5
1-39-15	389	6	365	6	393	6	296	5
1-39-30	237	4	261	5	279	4	299	5
1-40-15	156	4	195	4	168	4	137	4
1-40-30	240	5	211	5	181	5	181	4
1-46-15	191	4	215	4	210	4	191	4
1-46-30	116	3	119	3	146	4	122	3
1-49-15	467	7	400	7	499	8	382	6
1-49-30	226	5	269	6	347	7	238	5
1-50-15	354	7	298	7	338	7	254	5
1-50-30	101	3	116	4	120	4	97	3
1-51-15	278	5	241	6	256	5	222	5
1-51-30	105	3	107	4	149	4	109	3
1-52-15	260	6	234	6	268	5	190	4
1-52-30	83	3	286	7	196	6	193	4
