# Supplementary material
Source: MDPI journal article supplement (https://www.mdpi.com/2071-1050/15/10/7924)
Supplement: s1 [file s1 › S2 Raw Data Moisture Content Analysis.xlsx]

## Sheet: Pb Raw Data
Sample ID	Moisture Content (%)	Wet Concentration (ppm)	Error (1σ)	Dry Concentration (ppm)	Error (1σ)
2-17-6	10.31	123	3	295	4
		164	3	221	4
		131	3	176	3
2-17-12	13.03	46	2	52	2
		65	2	77	2
		55	2	99	2
2-18-6	8.92	309	4	349	4
		275	4	347	4
		396	5	390	5
2-18-12	11.17	29	2	20	1
		25	1	30	2
		28	2	22	1
2-19-6	13.57	932	7	1947	11
		833	7	755	6
		1267	9	1047	8
2-19-12	11.94	254	4	142	3
		171	3	174	3
		210	4	233	4
2-20-6	14.75	193	3	212	3
		233	3	266	4
		301	4	258	4
2-20-12	13.07	143	3	159	3
		170	3	160	3
		154	3	169	3
2-21-6	26.58	215	3	222	3
		193	3	227	3
		176	3	220	3
2-21-12	21.25	277	4	522	5
		166	3	230	3
		220	4	219	3
2-22-6	11.19	167	3	140	3
		101	2	176	3
		220	3	163	3
2-22-12	13.42	69	2	90	2
		84	2	157	3
		0	60	76	2
2-23-6	11.75	140	3	217	3
		181	3	195	3
		140	3	182	3
2-23-12	9	18	1	18	1
		14	1	17	1
		16	1	22	1
2-24-6	16.72	781	8	975	7
		692	6	877	7
		715	6	960	8
2-24-12	23.96	528	6	595	6
		521	5	570	5
		523	5	779	5
3-9	37.56	514	6	733	7
		473	5	623	6
		416	5	630	7
3-10	8.81	521	5	700	7
		484	4	735	7
		476	5	728	8
3-11	9.92	213	3	225	3
		245	3	339	4
		236	3	208	3
3-12	6.95	184	3	289	5
		221	4	221	3
		185	3	142	2
3-13	16.79	254	4	391	6
		252	3	374	5
		179	3	320	5
3-14	20.34	362	5	505	6
		335	4	483	6
		329	4	1282	11
3-15	18.71	311	4	466	5
		346	5	711	8
		317	4	317	3
3-16	16.92	1034	9	1108	9
		765	7	974	9
		798	7	872	8
3-17	22.28	272	3	361	5
		276	4	372	6
		247	3	226	3
3-18	20.61	396	4	382	5
		231	3	425	5
		338	4	1056	9
3-19	20.85	382	5	541	5
		318	4	491	6
		284	4	317	4
3-20	22.16	441	5	482	5
		636	5	608	6
		379	5	318	5
3-21	24.14	151	3	181	4
		156	3	195	3
		141	3	216	4
3-22	19.98	144	3	199	4
		149	3	230	4
		153	3	212	4
3-23	20.92	211	3	222	4
		166	3	248	4
		196	3	342	5
3-24	17.22	398	6	485	6
		333	5	445	5
		347	4	192	4

## Sheet: Pb Regression Residuals Data
X of Avg. Dry Pb Conc. (ppm)	Residuals of Avg. Dry Pb Conc. (ppm)	Fitted X of Avg. Dry Pb Conc. (ppm)	Fitted Y of Avg. Dry Pb Conc. (ppm)
139.333	36.9663	139.333	193.7
55.5	-15.0051	55.5	91.0051
326.667	-61.1825	326.667	423.183
27	-32.0928	27	56.0928
1010.67	-11.4115	1010.67	1261.08
212.5	-100.329	212.5	283.329
242.333	-74.5414	242.333	319.875
156.5	-52.0628	156.5	214.729
194.667	-38.4834	194.667	261.483
221.5	29.3126	221.5	294.354
162.667	-62.6169	162.667	222.284
51	22.1741	51	85.4926
153.667	-13.2586	153.667	211.259
16	-23.6178	16	42.6178
729.333	20.8867	729.333	916.447
524.5	-17.5271	524.5	665.527
467.667	66.0934	467.667	595.907
493.667	93.2436	493.667	627.756
231.333	-49.0665	231.333	306.4
196.667	-46.6	196.667	263.933
228.333	58.9419	228.333	302.725
342	314.701	342	441.966
324.667	77.2675	324.667	420.733
865.667	-98.7874	865.667	1083.45
265	-27.9746	265	347.641
321.667	203.942	321.667	417.058
328	24.8508	328	424.816
485.333	-148.215	485.333	617.548
149.333	-8.61699	149.333	205.95
148.667	8.53301	148.667	205.134
191	13.675	191	256.992
359.333	-89.199	359.333	463.199
Stnd. Dev.	88.3889
2s	176.778
	Outliers

## Sheet: Ni Raw Data
Sample ID	Moisture Content (%)	Wet Concentration (ppm)	Error (1σ)	Dry Concentration (ppm)	Error (1σ)
2-17-6	10.31	0	13	21	3
		12	3	16	3
		15	3	22	3
2-17-12	13.03	10	2	25	3
		9	2	19	3
		7	2	19	3
2-18-6	8.92	9	2	18	3
		9	2	18	3
		10	2	16	3
2-18-12	11.17	8	3	13	3
		0	13	18	3
		6	3	15	3
2-19-6	13.57	19	3	31	3
		17	3	17	2
		12	2	29	3
2-19-12	11.94	10	3	19	3
		10	2	27	3
		10	2	18	3
2-20-6	14.75	14	2	22	3
		14	2	22	3
		15	2	22	3
2-20-12	13.07	14	2	19	3
		14	2	24	3
		14	2	14	3
2-21-6	26.58	8	2	22	3
		17	2	24	3
		10	2	18	3
2-21-12	21.25	15	2	20	3
		17	2	19	3
		17	2	18	3
2-22-6	11.19	12	2	17	3
		13	2	19	3
		16	2	17	3
2-22-12	13.42	17	2	22	3
		14	2	20	3
		0	13	23	3
2-23-6	11.75	13	2	19	3
		15	2	16	3
		15	2	20	3
2-23-12	9	11	2	17	3
		14	2	14	3
		12	2	13	3
2-24-6	16.72	15	2	25	3
		19	3	27	3
		15	2	27	3
2-24-12	23.96	13	3	22	3
		12	2	23	3
		12	2	12	2
3-9	37.56	8	3	29	3
		15	2	31	3
		14	2	20	3
3-10	8.81	23	3	43	4
		15	2	39	3
		20	3	42	4
3-11	9.92	44	3	53	3
		54	3	70	3
		29	2	48	3
3-12	6.95	44	3	67	4
		27	3	18	2
		25	3	20	2
3-13	16.79	26	3	33	4
		25	3	40	3
		16	2	38	4
3-14	20.34	24	3	40	4
		25	3	40	3
		25	2	30	3
3-15	18.71	32	3	38	3
		22	3	43	4
		28	3	11	2
3-16	16.92	21	3	44	4
		21	3	33	3
		25	3	33	3
3-17	22.28	18	2	34	3
		18	3	39	4
		23	2	14	2
3-18	20.61	28	3	48	4
		30	2	54	3
		31	3	49	4
3-19	20.85	44	3	66	3
		41	3	65	4
		52	3	54	3
3-20	22.16	41	3	40	3
		24	2	66	3
		32	3	35	3
3-21	24.14	20	3	33	3
		18	3	25	3
		16	2	33	3
3-22	19.98	22	3	28	3
		18	3	33	4
		21	3	28	3
3-23	20.92	24	3	36	3
		25	3	30	3
		19	3	34	3
3-24	17.22	26	3	39	4
		28	3	34	3
		22	3	16	3

## Sheet: Ni Regression Residuals Data
X of Avg. Dry Ni Conc. (ppm)	Residuals of Avg. Dry Ni Conc. (ppm)	Fitted X of Avg. Dry Ni Conc. (ppm)	Fitted Y of Avg. Dry Ni Conc. (ppm)
9	2.11609	9	17.5506
9.5	2.87503	9.5	18.125
9.33333	-0.60017	9.33333	17.9335
4	3.52664	4	11.8067
16	0.07465	16	25.592
10	2.63398	10	18.6994
14.3333	-1.67739	14.3333	23.6774
14	-4.29447	14	23.2945
11.6667	0.71935	11.6667	20.614
16	-6.59202	16	25.592
13.6667	-5.24487	13.6667	22.9115
10.3333	2.58438	10.3333	19.0823
14.3333	-5.34406	14.3333	23.6774
12.5	-6.90463	12.5	21.5713
16.3333	0.35839	16.3333	25.9749
12.5	-2.5713	12.5	21.5713
12.3333	5.28683	12.3333	21.3798
19.3333	11.9121	19.3333	29.4213
42.3333	1.15685	42.3333	55.8432
32	-8.97246	32	43.9725
22.3333	4.13239	22.3333	32.8676
24.6667	1.11858	24.6667	35.5481
27.3333	-7.94483	27.3333	38.6115
22.3333	3.79906	22.3333	32.8676
19.6667	-0.8042	19.6667	29.8042
29.6667	9.04136	29.6667	41.292
45.6667	1.99426	45.6667	59.6724
32.3333	2.64462	32.3333	44.3554
18	2.44376	18	27.8896
20.3333	-0.90339	20.3333	30.57
22.6667	0.0828	22.6667	33.2505
25.3333	-6.64727	25.3333	36.3139
Stnd. Dev.	4.7749
2s	9.54981
	Outliers

## Sheet: Cu Raw Data
Sample ID	Moisture Content (%)	Wet Concentration (ppm)	Error (1σ)	Dry Concentration (ppm)	Error (1σ)
2-17-6	10.31	16	2	26	3
		15	3	25	3
		14	3	17	3
2-17-12	13.03	13	2	20	3
		10	2	23	3
		11	2	16	3
2-18-6	8.92	17	3	26	3
		18	3	17	2
		21	3	18	3
2-18-12	11.17	10	3	10	2
		9	2	16	2
		9	2	14	2
2-19-6	13.57	66	3	75	3
		50	3	50	3
		55	3	80	4
2-19-12	11.94	12	3	16	3
		16	2	21	3
		14	2	24	3
2-20-6	14.75	19	2	27	3
		25	3	23	3
		23	2	22	3
2-20-12	13.07	19	2	23	3
		18	2	26	3
		19	2	24	3
2-21-6	26.58	27	3	22	3
		19	2	23	3
		17	2	24	3
2-21-12	21.25	21	3	22	3
		10	2	22	3
		14	2	27	3
2-22-6	11.19	17	2	21	3
		16	2	19	3
		17	2	24	3
2-22-12	13.42	11	2	22	3
		12	2	21	3
		0	14	20	3
2-23-6	11.75	16	2	26	3
		16	2	25	3
		15	2	21	3
2-23-12	9	8	2	10	2
		10	2	12	2
		8	2	7	2
2-24-6	16.72	96	4	122	4
		81	3	137	4
		86	3	131	4
2-24-12	23.96	56	3	67	3
		52	3	59	3
		53	3	63	3
3-9	37.56	94	4	73	4
		46	3	66	4
		45	3	66	4
3-10	8.81	85	3	108	5
		63	3	105	4
		96	4	116	5
3-11	9.92	77	3	97	4
		92	3	113	4
		65	3	80	3
3-12	6.95	136	4	150	5
		95	4	82	3
		78	4	60	2
3-13	16.79	366	6	88	5
		49	3	82	4
		31	2	72	4
3-14	20.34	77	4	109	5
		72	4	98	4
		69	3	183	6
3-15	18.71	74	3	115	4
		81	4	126	5
		75	3	67	3
3-16	16.92	110	4	139	5
		95	4	134	5
		79	4	110	4
3-17	22.28	54	3	85	4
		55	3	89	5
		53	3	51	3
3-18	20.61	86	3	104	4
		73	3	110	4
		86	3	135	5
3-19	20.85	138	5	189	5
		110	3	177	5
		126	4	142	5
3-20	22.16	101	4	120	4
		88	3	167	4
		106	4	94	4
3-21	24.14	52	3	117	5
		58	3	80	4
		47	3	72	4
3-22	19.98	49	3	70	4
		52	3	74	4
		44	3	69	4
3-23	20.92	77	4	96	4
		71	3	91	4
		73	3	99	4
3-24	17.22	103	5	120	5
		87	4	106	4
		91	4	67	4

## Sheet: Cu Regression Residuals Data
X of Avg. Dry Cu Conc. (ppm)	Residuals of Avg. Dry Cu Conc. (ppm)	Fitted X of Avg. Dry Cu Conc. (ppm)	Fitted Y of Avg. Dry Cu Conc. (ppm)
15	-4.76937	15	27.436
11.5	-4.13559	11.5	23.8023
18.6667	-10.9095	18.6667	31.2429
9.5	-8.39248	9.5	21.7258
57	-2.70809	57	71.0414
14	-6.06448	14	26.3978
22.3333	-11.0497	22.3333	35.0497
18.5	-6.73649	18.5	31.0698
21	-10.6654	21	33.6654
15.5	-4.28848	15.5	27.9551
16.6667	-7.83308	16.6667	29.1664
7.66667	1.1776	7.66667	19.8224
15.6667	-4.12819	15.6667	28.1282
9	-11.54	9	21.2067
87.6667	27.1197	87.6667	102.88
54	-4.92675	54	67.9267
61.6667	-7.55313	61.6667	75.8865
81.3333	13.3618	81.3333	96.3049
78	3.82256	78	92.8441
103	-21.4664	103	118.8
148.667	-85.5452	148.667	166.212
72.6667	42.6931	72.6667	87.3069
76.6667	11.2068	76.6667	91.4598
94.6667	17.5188	94.6667	110.148
54	7.07325	54	67.9267
81.6667	19.6824	81.6667	96.6509
124.667	28.0388	124.667	141.295
98.3333	13.0453	98.3333	113.955
52.3333	23.4703	52.3333	66.1964
48.3333	8.95652	48.3333	62.0435
73.6667	6.98819	73.6667	88.3451
93.6667	-11.4429	93.6667	109.11
Stnd. Dev.	21.2774
2s	42.5548
	Outliers

## Sheet: Zn Raw Data
Sample ID	Moisture Content (%)	Wet Concentration (ppm)	Error (1σ)	Dry Concentration (ppm)	Error (1σ)
2-17-6	10.31	74	3	134	3
		93	3	120	3
		74	3	112	3
2-17-12	13.03	60	2	70	3
		59	2	78	3
		58	2	81	3
2-18-6	8.92	102	3	130	3
		111	3	137	3
		128	3	124	3
2-18-12	11.17	63	3	70	3
		60	2	76	3
		62	3	71	3
2-19-6	13.57	379	5	414	6
		333	5	314	4
		609	7	382	6
2-19-12	11.94	120	3	112	3
		117	3	130	3
		117	3	147	3
2-20-6	14.75	113	3	135	3
		166	3	138	3
		140	3	131	3
2-20-12	13.07	96	3	107	3
		105	3	100	3
		100	3	115	3
2-21-6	26.58	105	3	131	3
		110	3	120	3
		103	3	150	4
2-21-12	21.25	104	3	108	3
		102	3	112	3
		104	3	116	3
2-22-6	11.19	97	3	109	3
		89	3	118	3
		84	3	123	3
2-22-12	13.42	62	2	76	3
		60	2	106	3
		0	50	76	3
2-23-6	11.75	86	3	120	3
		102	3	114	3
		94	3	121	3
2-23-12	9	34	2	36	2
		32	2	41	2
		32	2	40	2
2-24-6	16.72	221	4	275	5
		235	4	270	5
		202	4	254	5
2-24-12	23.96	72	3	96	3
		82	3	95	3
		78	3	52	2
3-9	37.56	159	4	313	5
		175	4	267	5
		172	4	260	5
3-10	8.81	337	5	449	7
		284	4	438	6
		326	5	430	7
3-11	9.92	141	3	158	3
		146	3	185	4
		168	3	135	3
3-12	6.95	163	3	258	5
		189	4	105	2
		157	4	120	2
3-13	16.79	189	4	297	6
		187	4	284	5
		143	3	268	6
3-14	20.34	287	5	407	6
		266	5	361	6
		251	4	347	6
3-15	18.71	288	5	387	6
		289	5	524	8
		300	5	175	3
3-16	16.92	260	5	335	6
		231	5	333	6
		266	5	301	5
3-17	22.28	230	4	364	6
		275	5	361	7
		236	4	203	3
3-18	20.61	223	4	285	5
		183	3	318	5
		215	4	299	5
3-19	20.85	336	5	470	6
		287	4	398	6
		260	5	328	5
3-20	22.16	279	5	318	5
		230	4	331	5
		282	5	309	5
3-21	24.14	156	4	198	5
		164	4	244	5
		150	3	215	5
3-22	19.98	164	3	225	5
		161	4	251	6
		162	3	223	5
3-23	20.92	158	4	733	9
		140	3	185	4
		147	3	215	5
3-24	17.22	234	5	271	6
		228	5	275	5
		195	4	151	4

## Sheet: Zn Regression Residuals Data
X of Avg. Dry Zn Conc. (ppm)	Residuals of Avg. Dry Zn Conc. (ppm)	Fitted X of Avg. Dry Zn Conc. (ppm)	Fitted Y of Avg. Dry Zn Conc. (ppm)
80.3333	3.86478	80.3333	118.135
59.5	-18.8201	59.5	95.1534
113.667	-24.5727	113.667	154.906
61.5	-25.0264	61.5	97.3597
440.333	-145.261	440.333	515.26
118.5	-30.5712	118.5	160.238
139.667	-48.9207	139.667	183.587
100.5	-33.0483	100.5	140.382
106	-12.7821	106	146.449
103	-31.1394	103	143.139
90	-12.1321	90	128.799
40.6667	11.6221	40.6667	74.3779
94	-14.8779	94	133.211
33	-26.9206	33	65.9206
219.333	-5.13637	219.333	271.47
77	-33.4581	77	114.458
168.667	64.422	168.667	215.578
315.667	61.2625	315.667	377.737
151.667	-37.4915	151.667	196.825
169.667	-55.6811	169.667	216.681
173	62.6418	173	220.358
268	46.5115	268	325.155
292.333	10.0021	292.333	351.998
252.333	15.1272	252.333	307.873
247	7.34382	247	301.99
207	42.8022	207	257.864
294.333	44.4625	294.333	354.204
263.667	-1.04161	263.667	320.375
156.667	16.6595	156.667	202.34
162.333	24.4085	162.333	208.592
148.333	184.519	148.333	193.148
219	-38.7687	219	271.102
Stnd. Dev.	53.8037
2s	107.607
	Outliers
