# Supplementary material
Source: MDPI journal article supplement (https://www.mdpi.com/2071-1050/15/10/7924)
Supplement: s1 [file s1 › S3 Raw Data Carbon and Nitrogen Content.xlsx]

## Sheet: C and N
Sample ID	C Content (%)	N Content (%)	C:N
1-007-15	2.47	0.16	15.44
1-007-30	3.635	0.11	33.05
1-010-15	0.835	0.06	13.92
1-010-30	0.625	0.05	12.5
1-018-15	2.055	0.15	13.7
1-018-30	1.68	0.1	16.8
1-020-15	3.12	0.22	14.18
1-020-30	1.695	0.1	16.95
1-030-15	1.01	0.085	11.91
1-030-30	0.355	0.04	8.88
1-034-15	2.575	0.21	12.26
1-034-30	1.695	0.125	13.58
1-037-15	3.705	0.22	16.84
1-037-30	3.235	0.15	21.57
1-038-15	4.29	0.16	26.81
1-038-30	4.125	0.09	45.83
1-039-15	2.705	0.11	24.59
1-039-30	2.185	0.11	19.86
1-040-15	3.195	0.18	17.75
1-040-30	2.57	0.115	22.39
1-046-15	2.08	0.11	18.91
1-046-30	1.27	0.07	18.14
1-049-15	2.13	0.13	16.38
1-049-30	1.29	0.08	16.13
1-050-15	2.59	0.13	19.92
1-050-30	1.025	0.05	20.5
1-051-15	4.665	0.17	27.44
1-051-30	1.825	0.075	24.12
1-052-15	3.825	0.15	25.5
1-052-30	3.88	0.08	48.5
